# Supplementary material for: Measurement report: Chemical characteristics of PM 2.5 during typical biomass burning season at an agricultural site of the North China Plain
Source: Copernicus journal article supplement (doi:10.5194/acp-2020-1006), 2020-10-09
Supplement: Supplementary file 2 [file acp-2020-1006-supplement.pdf]

*Supplement of*

**Measurement report: Chemical characteristics of PM<sub>2.5</sub> during typical biomass burning season at an agricultural site of the North China Plain**

**Linlin Liang et al.**

Correspondence to: Linlin Liang (lianglinlin@cma.gov.cn)

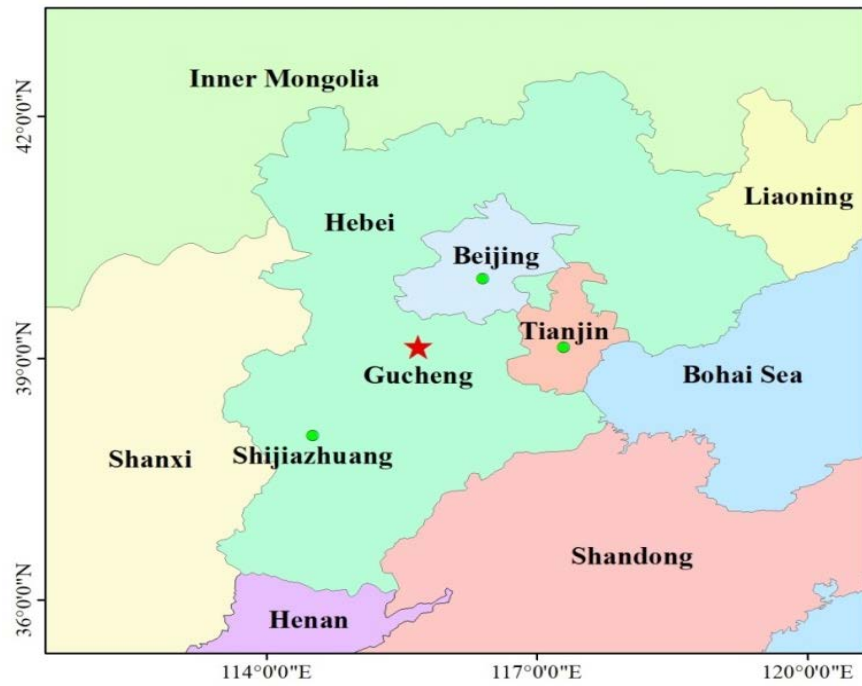

**Figure S1.** Location of Gucheng measurement station (red star) and the surrounding provinces.

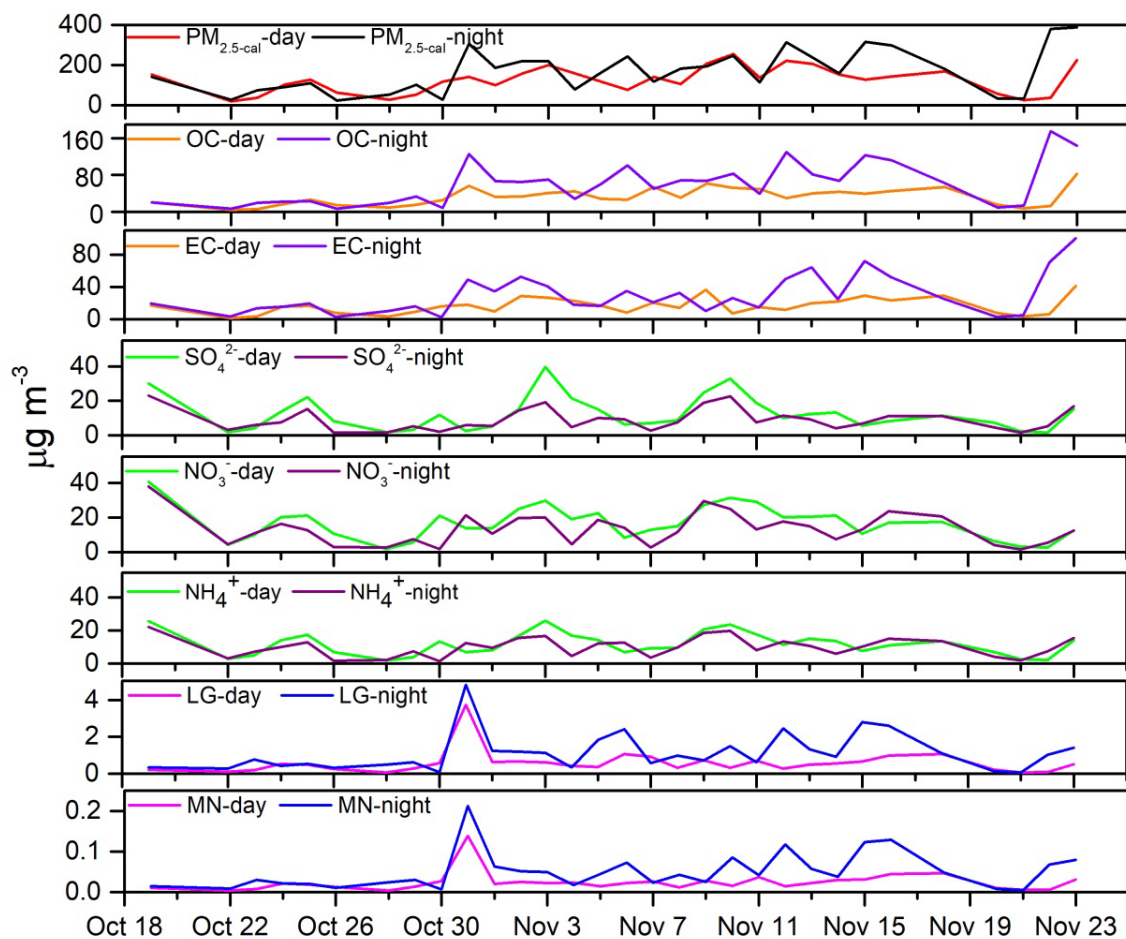

**Figure S2.** Time-series variation obtained for  $\text{PM}_{2.5\text{-cal}}$  and its major components (OC, EC,  $\text{SO}_4^{2-}$ ,  $\text{NO}_3^-$  and  $\text{NH}_4^+$ ), biomass burning tracers (LG and MN) during daytime and nighttime at GC site during the sampling period from 19 Oct to 23 Nov 2016.

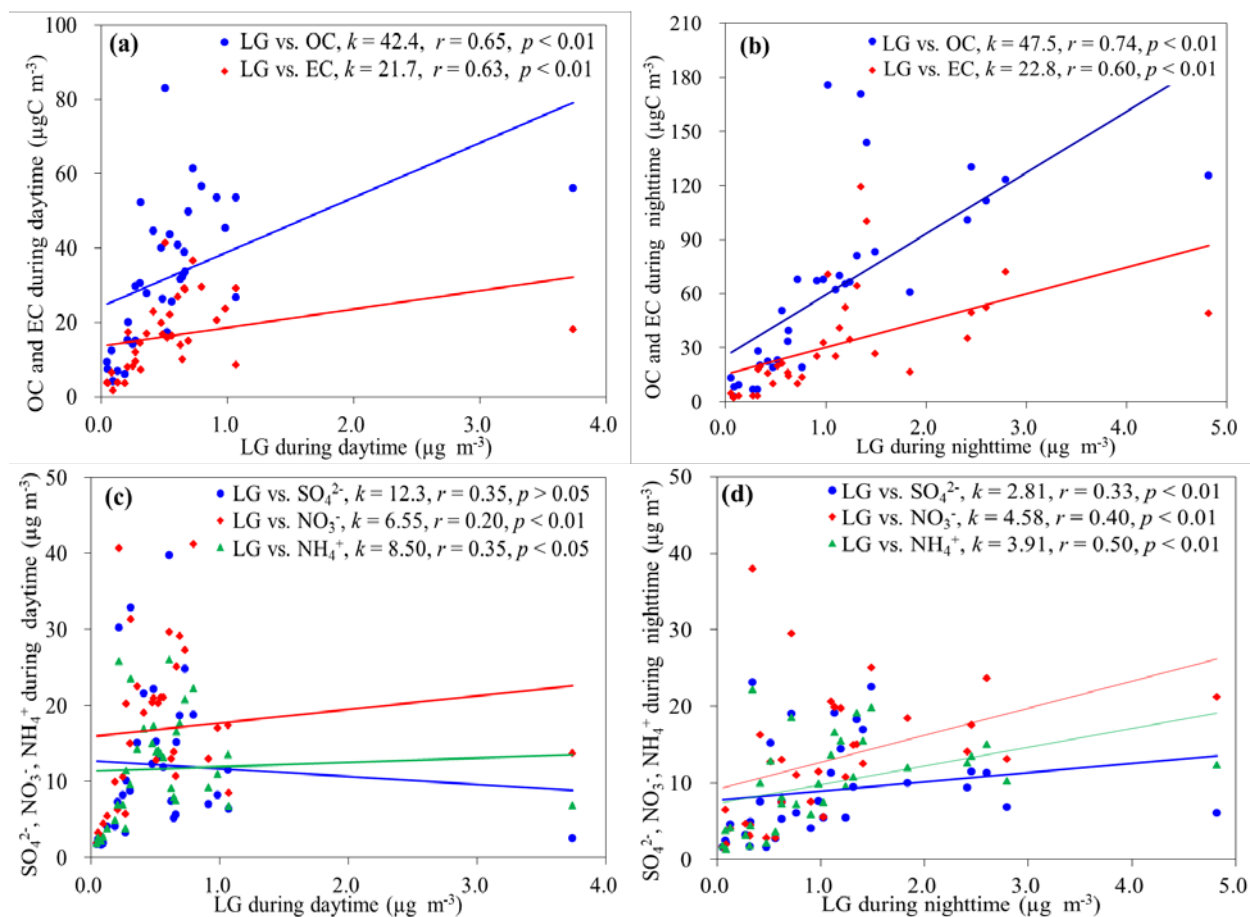

**Figure S3.** Correlations between LG and OC as well as EC during (a) daytime and (b) nighttime, and scatter plot of LG versus SNA (i.e.,  $\text{SO}_4^{2-}$ ,  $\text{NO}_3^-$  and  $\text{NH}_4^+$ ) during (c) daytime and (d) nighttime.

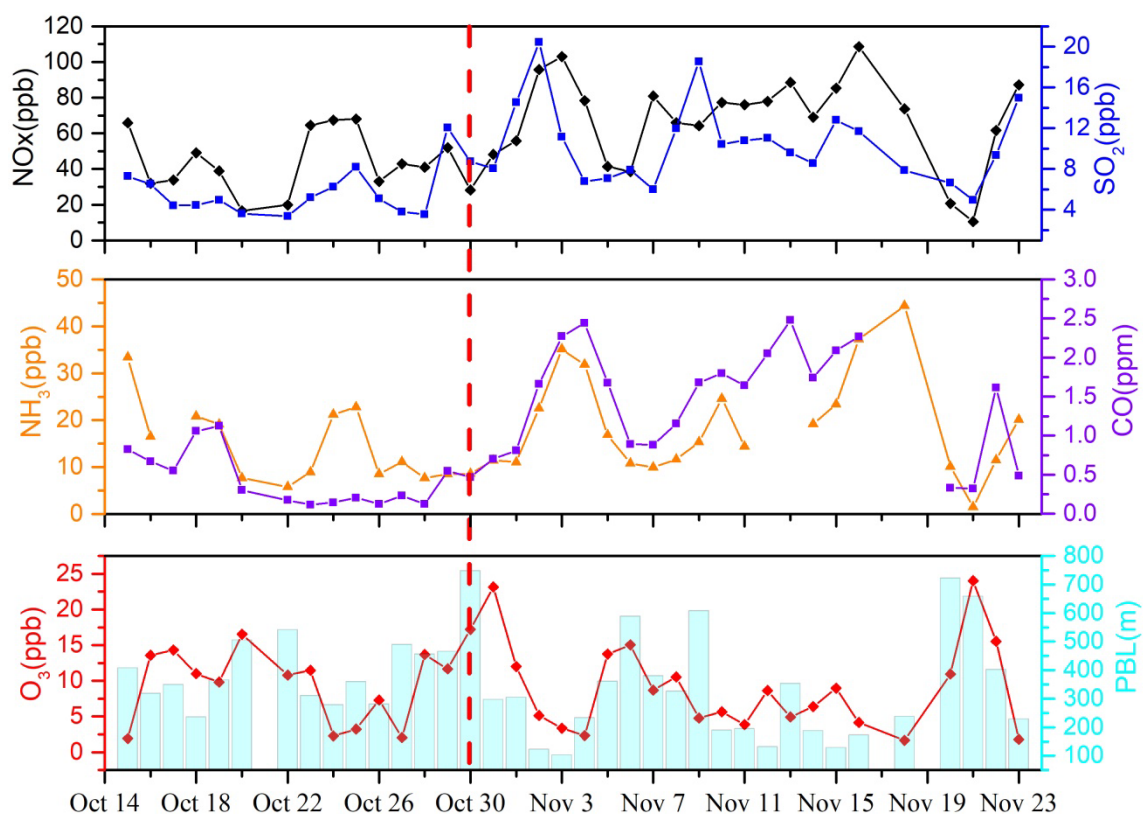

**Figure S4.** Time-series variation obtained for reactive gases and PBL at GC site during the observation period from 15 Oct to 23 Nov 2016.

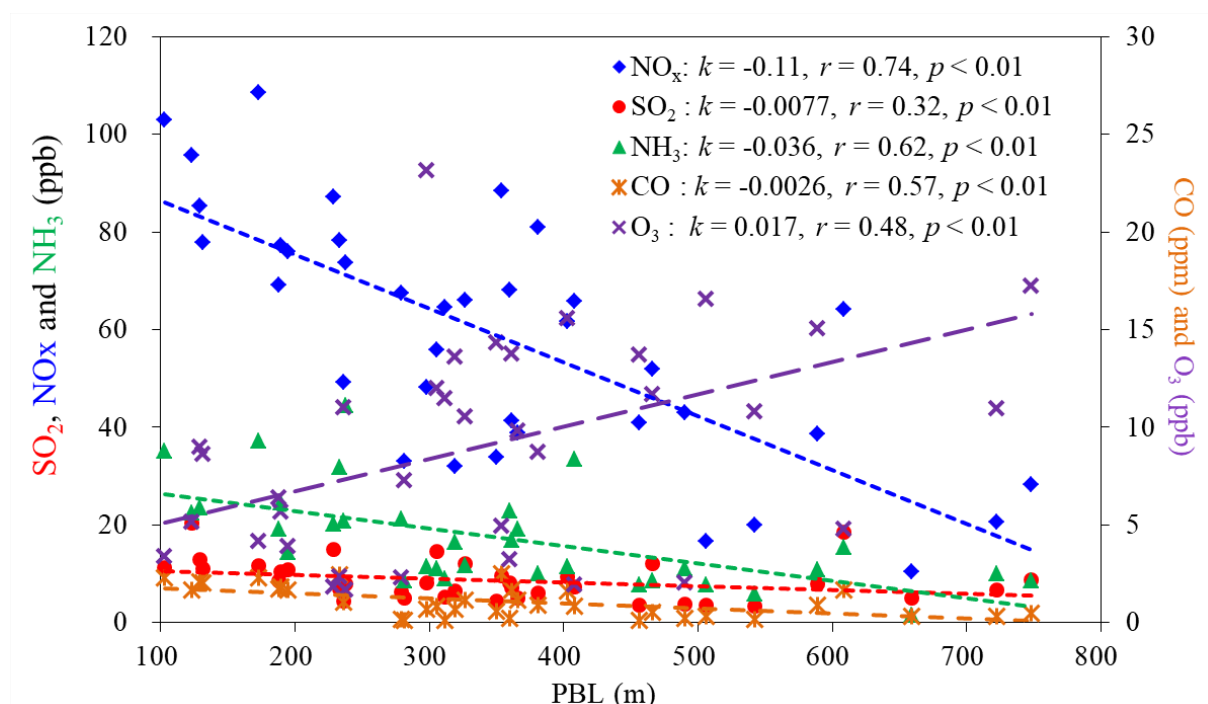

**Figure S5.** Relationships between daily average PBL and gases at GC site during the observation period.
